# Supplementary material for: Identification of New Potential Prognostic and Predictive Markers in High-Grade Osteosarcoma Using Whole Exome Sequencing
Source: MDPI journal article supplement (doi:10.3390/ijms241210086), 2023-06-13
Supplement: s1 [file s1]

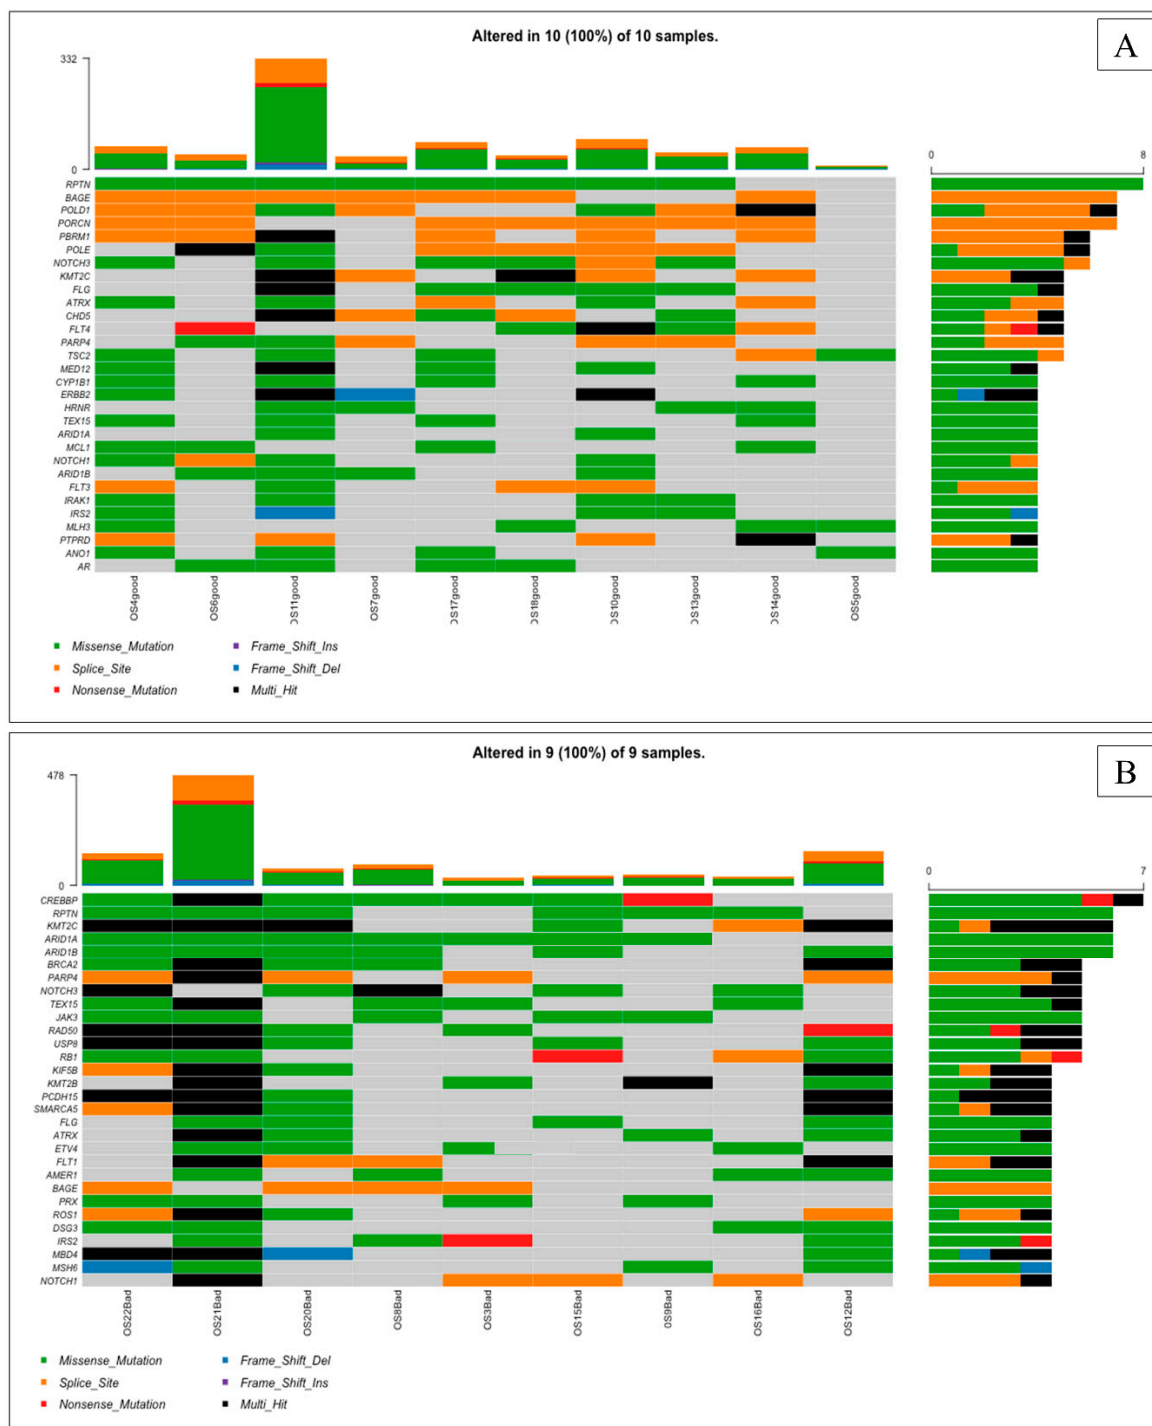

**Figure S1.** The 30 most mutated genes and the number of mutations stratified per gene and per sample in the GR (A) and PR (B).

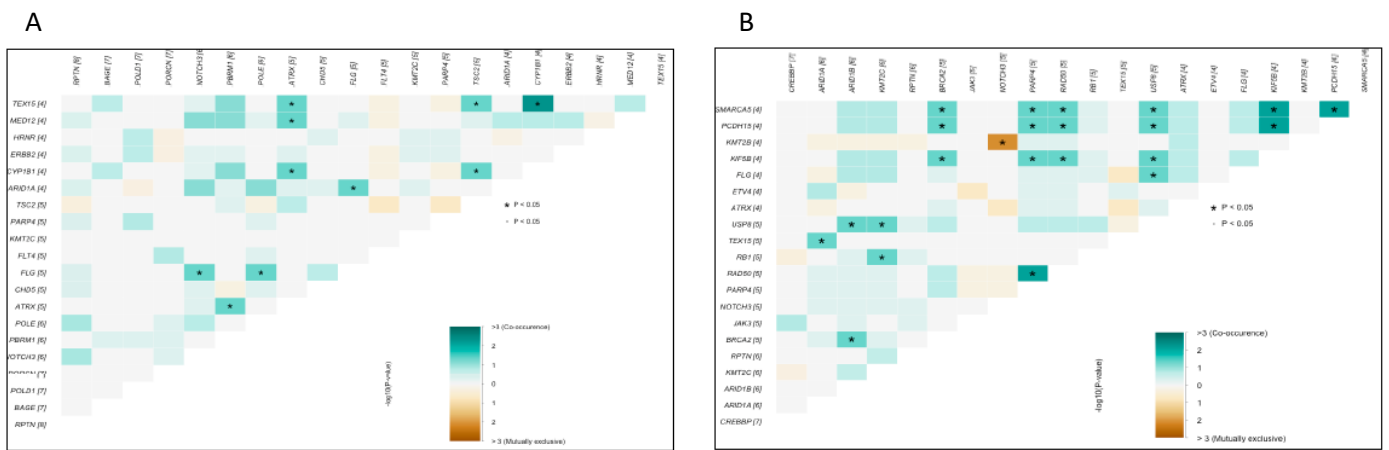

**Figure S2.** Somatic interactions between the most frequently mutated genes in GR (A) and PR (B) groups, both co-occurrence and mutually exclusive, using pairwise Fisher exact tests.
